# Supplementary material for: Prevalence and risk analysis of mobile colistin resistance and extended-spectrum β-lactamase genes carriage in pet dogs and their owners: a population based cross-sectional study
Source: PubMed Central journal article supplement — Emerg Microbes Infect. 2021 Feb 15;10(1):242–51. doi: 10.1080/22221751.2021.1882884 (PMC7889244; doi:10.1080/22221751.2021.1882884), 2021-02-15
Supplement: TEMI_A_1882884_SM3815.pdf [file TEMI_A_1882884_SM3815.pdf]

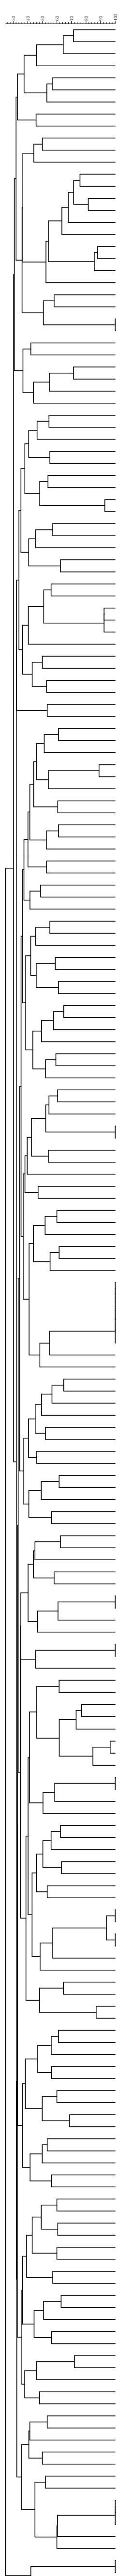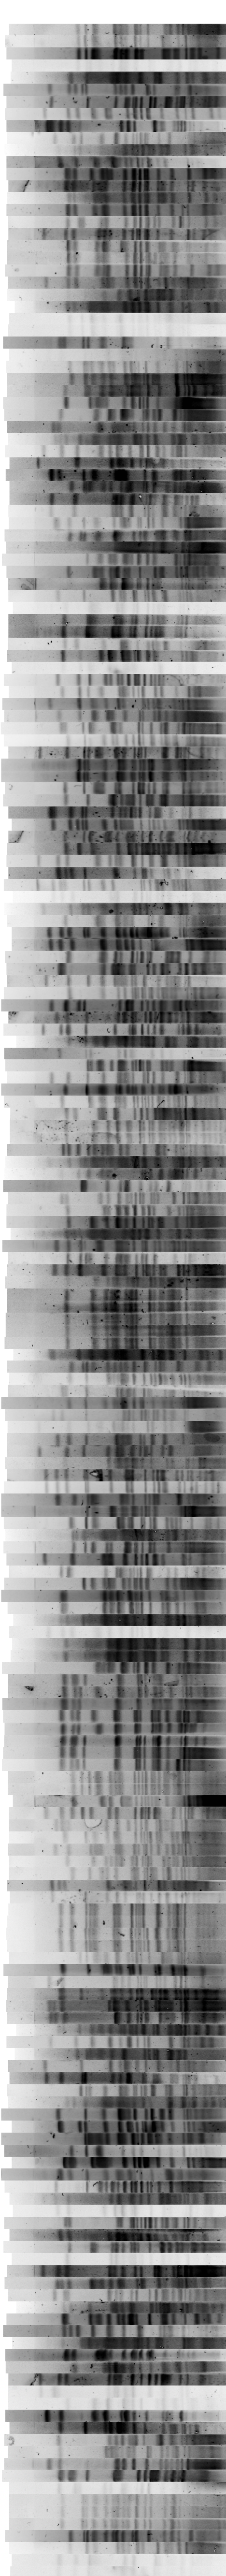

| Isolates | Family | MCR-1 | CTX-M | Origin |
|----------|--------|-------|-------|--------|
| 919R1    | 288    | -     | +     | dog    |
| 817-1    | 86     | -     | +     | dog    |
| 111AECd  | 111    | -     | -     | dog    |
| 166FEC   | 166    | +     | +     | human  |
| 152FECd  | 152    | -     | -     | human  |
| 839-1    | 231    | +     | +     | dog    |
| 104FECd  | 104    | -     | -     | human  |
| 150AECd  | 150    | -     | -     | dog    |
| 111R1    | 243    | -     | +     | human  |
| 795R1    | 182    | -     | +     | dog    |
| 105FECd  | 105    | -     | -     | human  |
| 856R1    | 219    | -     | +     | dog    |
| 113FECd  | 113    | -     | -     | human  |
| 181AECd  | 181    | -     | -     | dog    |
| 141AECd  | 141    | -     | -     | dog    |
| 102AECd  | 102    | -     | -     | dog    |
| 759-1    | 169    | -     | +     | dog    |
| 140AECd  | 140    | -     | -     | dog    |
| 733-2    | 133    | -     | +     | dog    |
| 727-2    | 128    | -     | +     | dog    |
| 136AECd  | 136    | -     | -     | dog    |
| 665-2    | 58     | -     | +     | dog    |
| 134AECd  | 134    | -     | -     | dog    |
| 187FECd  | 187    | -     | -     | human  |
| 125FEC   | 125    | +     | -     | human  |
| 72AEC    | 72     | +     | -     | dog    |
| 907R1    | 236    | -     | +     | dog    |
| 62R1     | 200    | -     | +     | human  |
| 855R1    | 215    | -     | +     | dog    |
| 474R1    | 6      | -     | +     | human  |
| 744-1    | 145    | -     | +     | dog    |
| 648R     | 25     | -     | +     | dog    |
| 630R1    | 6      | -     | +     | dog    |
| 168AEC   | 168    | +     | +     | dog    |
| 141FECd  | 141    | -     | -     | human  |
| 818-1    | 83     | -     | +     | dog    |
| 249FEC   | 249    | +     | -     | human  |
| 122FEC   | 122    | +     | -     | human  |
| 285AEC   | 285    | +     | -     | dog    |
| 258AEC   | 258    | +     | +     | dog    |
| 879R     | 267    | -     | +     | dog    |
| 63R1     | 194    | -     | +     | human  |
| 19FEC    | 19     | +     | -     | human  |
| 887P     | 255    | -     | +     | dog    |
| 657-1    | 49     | -     | +     | dog    |
| 109FECd  | 109    | -     | -     | human  |
| 676R     | 78     | -     | +     | dog    |
| 880B     | 260    | -     | +     | dog    |
| 202FEC   | 202    | +     | -     | human  |
| 175FWC   | 175    | +     | -     | human  |
| 188FEC   | 188    | +     | -     | human  |
| 756-1    | 149    | -     | +     | dog    |
| 697R1    | 90     | -     | +     | dog    |
| 161FEC   | 161    | +     | -     | human  |
| 165FECd  | 165    | -     | -     | human  |
| 37R1     | 173    | -     | +     | human  |
| 89R1     | 224    | -     | +     | human  |
| 635-1    | 22     | -     | +     | dog    |
| 11R1     | 140    | -     | +     | human  |
| 863R1    | 207    | -     | +     | dog    |
| 126FECd  | 126    | -     | -     | human  |
| 772R     | 156    | -     | +     | dog    |
| 769-2    | 165    | -     | +     | dog    |
| 130AECd  | 130    | -     | -     | dog    |
| 647-1    | 20     | -     | +     | dog    |
| 233A1EC  | 233    | +     | -     | dog    |
| 205FECd  | 205    | -     | -     | human  |
| 177FECd  | 177    | -     | -     | human  |
| 131R     | 267    | -     | +     | human  |
| 156R1    | 298    | -     | +     | human  |
| 249AEC   | 249    | +     | -     | dog    |
| 807-1    | 323    | -     | +     | dog    |
| 231FEC   | 231    | +     | -     | human  |
| 118FECd  | 118    | -     | -     | human  |
| 873R1    | 262    | -     | -     | dog    |
| 14FECd   | 14     | -     | -     | human  |
| 149FECd  | 149    | -     | -     | human  |
| 136FECd  | 136    | -     | -     | human  |
| 100FECd  | 100    | -     | -     | human  |
| 725R1    | 125    | -     | +     | dog    |
| 159FECd  | 159    | -     | +     | human  |
| 791-1    | 190    | -     | +     | dog    |
| 169FECd  | 169    | -     | -     | human  |
| 227AECd  | 227    | -     | -     | dog    |
| 207FECd  | 207    | -     | -     | human  |
| 895R1    | 257    | -     | +     | dog    |
| 161R1    | 294    | -     | +     | human  |
| 781-1    | 197    | -     | +     | dog    |
| 774-2    | 193    | -     | +     | dog    |
| 808W     | 174    | -     | +     | dog    |
| 920R1    | 282    | -     | +     | dog    |
| 123FECd  | 123    | -     | -     | human  |
| 120FECd  | 120    | -     | -     | human  |
| 694-1    | 81     | -     | +     | dog    |
| 130FECd  | 130    | -     | -     | human  |
| 108FECd  | 108    | -     | -     | human  |
| 912R1    | 291    | -     | +     | dog    |
| 730R     | 129    | -     | +     | dog    |
| 124R     | 261    | -     | +     | human  |
| 110FECd  | 110    | -     | -     | human  |
| 151AECd  | 151    | -     | -     | dog    |
| 822-1    | 303    | -     | +     | dog    |
| 750-2    | 152    | -     | +     | dog    |
| 34R1     | 178    | -     | +     | human  |
| 173AEC   | 173    | +     | -     | dog    |
| 160AEC   | 160    | +     | -     | dog    |
| 131AEC   | 131    | +     | -     | dog    |
| 116AEC   | 116    | +     | -     | dog    |
| 112AEC   | 112    | +     | -     | dog    |
| 84AEC    | 84     | +     | -     | dog    |
| 170AECd  | 170    | -     | -     | dog    |
| 219FECd  | 219    | -     | -     | human  |
| 20R1     | 155    | -     | +     | human  |
| 749-1    | 154    | -     | +     | dog    |
| 800R     | 176    | -     | +     | dog    |
| 128FECd  | 128    | -     | -     | human  |
| 90R1     | 204    | -     | +     | human  |
| 146FECd  | 146    | -     | -     | human  |
| 234AECd  | 234    | -     | -     | dog    |
| 287FEC   | 287    | +     | -     | human  |
| 225FECd  | 225    | -     | -     | human  |
| 214FECd  | 214    | -     | -     | human  |
| 777-2    | 199    | -     | +     | dog    |
| 806-2    | 172    | -     | +     | dog    |
| 150FECd  | 150    | -     | -     | human  |
| 126AECd  | 126    | -     | -     | dog    |
| 239AECd  | 239    | -     | -     | dog    |
| 115FECd  | 115    | -     | -     | human  |
| 761R     | 167    | -     | +     | dog    |
| 615-1    | 13     | -     | +     | dog    |
| 780-1    | 192    | -     | +     | dog    |
| 95W      | 239    | -     | +     | human  |
| 184AECd  | 184    | -     | -     | dog    |
| 87AEC    | 87     | +     | +     | dog    |
| 166AECd  | 166    | -     | -     | dog    |
| 151FECd  | 151    | -     | -     | human  |
| 654-1    | 50     | -     | +     | dog    |
| 677R1    | 68     | -     | +     | dog    |
| 673R1    | 65     | -     | +     | dog    |
| 812R1    | 92     | -     | +     | dog    |
| 653-1    | 44     | -     | +     | dog    |
| 854R     | 220    | -     | +     | dog    |
| 862R     | 216    | -     | +     | dog    |
| 640-1    | 7      | -     | +     | dog    |
| 662-2    | 47     | -     | +     | dog    |
| 701-1    | 95     | -     | +     | dog    |
| 713-2    | 210    | -     | +     | dog    |
| 217AECd  | 217    | -     | -     | dog    |
| 911R1    | 292    | -     | +     | dog    |
| 652R1    | 46     | -     | +     | dog    |
| 35R1     | 171    | -     | +     | human  |
| 710-1    | 118    | -     | +     | dog    |
| 77R1     | 203    | -     | +     | human  |
| 134W1    | 280    | -     | +     | human  |
| 693R1    | 103    | -     | +     | dog    |
| 112FECd  | 112    | -     | -     | human  |
| 877W     | 268    | -     | +     | dog    |
| 876W     | 261    | -     | +     | dog    |
| 852W1    | 218    | -     | +     | dog    |
| 875W     | 269    | -     | +     | dog    |
| 101R1    | 237    | -     | +     | human  |
| 842-1    | 233    | -     | +     | dog    |
| 685-1    | 89     | -     | +     | dog    |
| 132R     | 268    | -     | +     | human  |
| 746-1    | 143    | -     | +     | dog    |
| 17R1     | 143    | -     | +     | human  |
| 199FECd  | 199    | -     | -     | human  |
| 147R1    | 292    | -     | +     | human  |
| 191FECd  | 191    | -     | -     | human  |
| 682-2    | 55     | -     | +     | dog    |
| 253AEC   | 253    | +     | +     | dog    |
| 764-2    | 163    | -     | +     | dog    |
| 142AECd  | 142    | -     | -     | dog    |
| 801-1    | 185    | -     | +     | dog    |
| 115AECd  | 115    | -     | -     | dog    |
| 790-1    | 189    | -     | +     | dog    |
| 888W1    | 252    | -     | +     | dog    |
| 14AECd   | 14     | -     | -     | dog    |
| 802-1    | 186    | -     | +     | dog    |
| 184FWC   | 184    | -     | -     | human  |
| 144FECd  | 144    | -     | -     | human  |
| 188AEC   | 188    | +     | -     | dog    |
| 223FECd  | 223    | -     | -     | human  |
| 300AEC   | 300    | +     | -     | dog    |
| 234FECd  | 234    | -     | -     | human  |
| 168FEC   | 168    | +     | +     | human  |
| 104R1    | 242    | -     | +     | human  |
| 42AEC    | 42     | +     | +     | dog    |
| 741-1    | 146    | -     | +     | dog    |
| 211FECd  | 211    | -     | -     | human  |
| 103FECd  | 103    | -     | -     | human  |
| 928R1    | 272    | -     | +     | dog    |
| 157AECd  | 157    | -     | +     | dog    |
| 872R1    | 271    | -     | +     | dog    |
| 109AEC   | 109    | +     | -     | dog    |
| 182FECd  | 182    | -     | -     | human  |
| 69AEC    | 69     | +     | +     | dog    |
| 56FEC    | 56     | +     | -     | human  |
| 884R     | 254    | -     | +     | dog    |
| 266FWC   | 266    | +     | -     | human  |
| 230AECd  | 230    | -     | -     | dog    |
| 687R1    | 81     | -     | +     | dog    |
| 218FECd  | 218    | -     | -     | human  |
| 661-1    | 64     | -     | +     | dog    |
| 100AEC   | 100    | +     | +     | dog    |
| 499W1    | 66     | -     | +     | human  |
| 491W1    | 29     | -     | +     | human  |
| 622W1    | 27     | -     | +     | dog    |
| 117FECd  | 117    | -     | -     | human  |
| 19R1     | 157    | -     | +     | human  |
| 164AEC   | 164    | +     | +     | dog    |
| 159AEC   | 159    | +     | +     | dog    |
| 904R     | 241    | -     | +     | dog    |
