# Supplementary figures and images for: Prevalence and risk analysis of mobile colistin resistance and extended-spectrum β-lactamase genes carriage in pet dogs and their owners: a population based cross-sectional study
Source: PubMed Central journal article supplement — Emerg Microbes Infect. 2021 Feb 15;10(1):242–51. doi: 10.1080/22221751.2021.1882884 (PMC7889244; doi:10.1080/22221751.2021.1882884), 2021-02-15

## CTX-M genotype

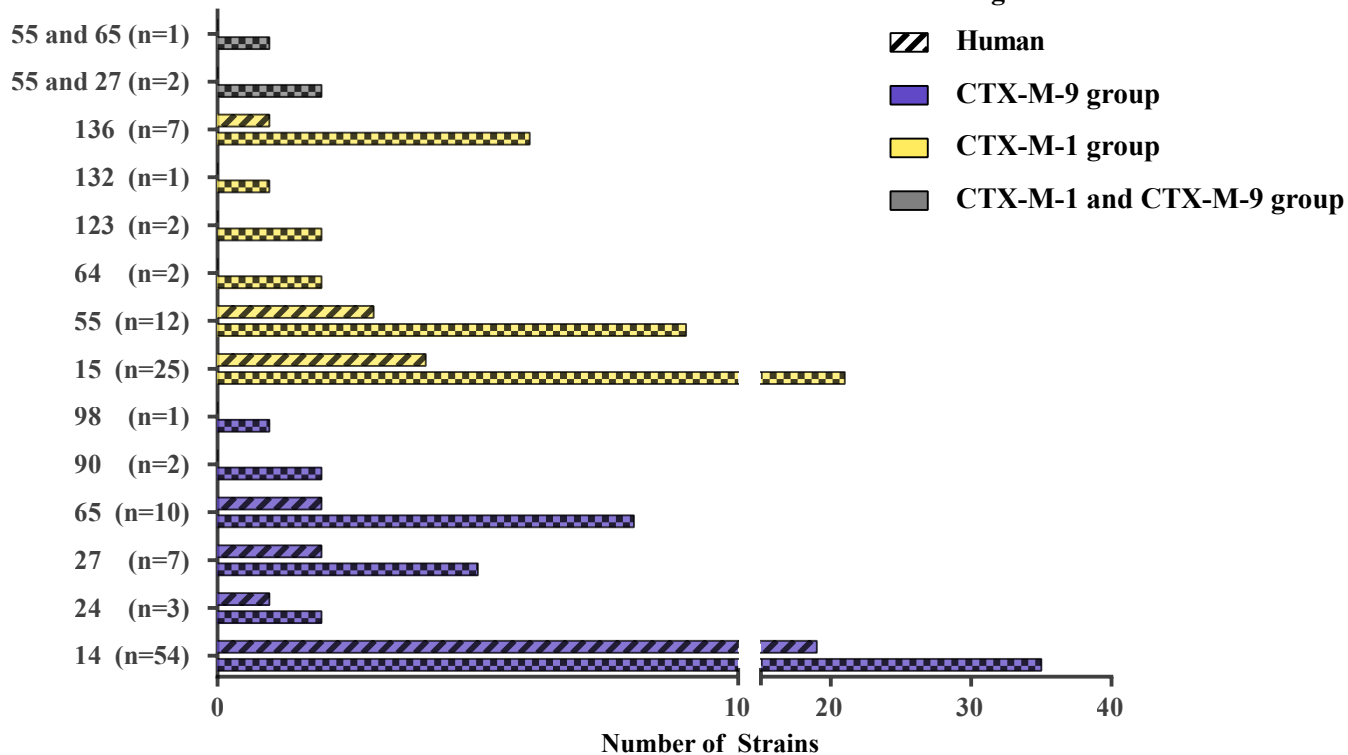

Supplement: TEMI_A_1882884_SM3789.pdf [file TEMI_A_1882884_SM3789.pdf]
